# Supplementary material for: The Effects of Biochar and Its Combination with Compost on Lettuce (Lactuca sativaL.) Growth, Soil Properties, and Soil Microbial Activity and Abundance
Source: Hindawi journal article supplement (doi:10.1155/2017/3158207), 2017-01-01
Supplement: f1 [file 3158207.f1.pdf]

## SUPPORTING INFORMATION

**Table S1. Pre-planting soil physicochemical characteristics.** Methods for the soil chemical characterization are described in the soil characterization section. Particle size distribution was quantified by hydrometer analysis on samples previously dry-sieved at 2 mm as detailed in Amendola et al. [31]. All concentrations are on a dry matter basis and represent the means of three replicates  $\pm$  standard deviation.

| PARAMETER                          | VALUE             |
|------------------------------------|-------------------|
| pH                                 | 7.1 $\pm$ 0.20    |
| Alkalinity (% CaCO <sub>3</sub> )  | 7.6 $\pm$ 0.40    |
| EC (dS/m)                          | 0.8 $\pm$ 0.02    |
| Moisture (g/kg)                    | 48.9 $\pm$ 4.07   |
| Ash (%)                            | 93.8 $\pm$ 0.89   |
| N <sub>tot</sub> (g/kg)            | 1.3 $\pm$ 0.07    |
| P <sub>tot</sub> (mg/kg)           | 286.8 $\pm$ 15.90 |
| P <sub>av</sub> (mg/kg)            | <12.0 $\pm$ 0.00  |
| C <sub>tot</sub> (g/kg)            | 18.9 $\pm$ 0.40   |
| CEC (cmol/kg)                      | 33.8 $\pm$ 3.43   |
| <b>Particle size distribution:</b> |                   |
| $\phi > 2$ mm (%)                  | 13.2 $\pm$ 0.7    |
| 200 $\mu$ m < $\phi$ < 2 mm (%)    | 39.4 $\pm$ 1.6    |
| 50 < $\phi$ < 200 $\mu$ m (%)      | 11.4 $\pm$ 1.2    |
| 20 < $\phi$ < 50 $\mu$ m (%)       | 5.0 $\pm$ 0.2     |
| 2 < $\phi$ < 20 $\mu$ m (%)        | 17.1 $\pm$ 2.4    |
| $\phi < 2$ $\mu$ m (%)             | 13.9 $\pm$ 1.9    |
